# Supplementary material
Source: Springer Nature journal article supplement (https://www.springermedizin.de/resource/supplementary/13017_2007_87_MOESM1_ESM.pdf/9635444)

**A**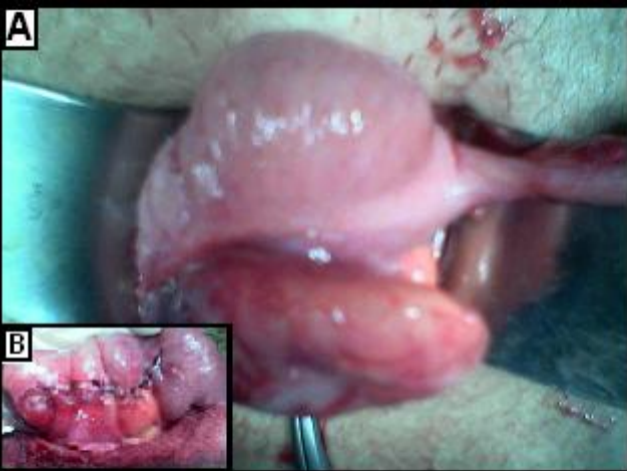**B**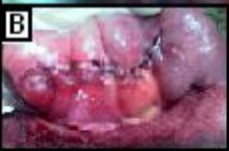

Supplement: MOESM1 [file 9635444]
